1 Comparative analysis of 24 chloroplast genomes yields highly informative genetic  
2 markers for the Brazil nut family (Lecythidaceae)

3  
4 Ashley M. Thomson<sup>\*1,2</sup>, Oscar M. Vargas<sup>\*1</sup>, Christopher W. Dick<sup>1,3</sup>

- 5 1) Department of Ecology and Evolutionary Biology, University of Michigan, Ann Arbor,  
6 MI 48109  
7 2) Faculty of Natural Resources Management. Lakehead University, Thunder Bay, Ontario,  
8 Canada, P7B 5E1  
9 3) Smithsonian Tropical Research Institute, Republic of Panama

10

11 \* These authors contributed equally to this work

12 **Abstract**

13 The tropical tree family Lecythidaceae (order Ericales) has enormous ecological and  
14 economic importance in the Amazon basin. Lecythidaceae species can be difficult to identify  
15 without molecular data, however, and phylogenetic relationships within and among the most  
16 diverse Amazonian genera, *Lecythis* and *Eschweilera*, are unresolved. In order to develop  
17 genetic markers for ecological and evolutionary studies in the family, we used genome skimming  
18 to assemble *de novo* the full plastome of the Brazil nut tree (*Bertholletia excelsa*) and 23 other  
19 Lecythidaceae species. Indices of nucleotide diversity and phylogenetic signal were used to  
20 identify regions suitable for genetic marker development. The *B. excelsa* plastome contained  
21 160,472 bp and was arranged in a quadripartite structure consisting of a large single copy region  
22 (85,830 bp), a small single copy region (16,670 bp), and two inverted repeats (of 27,481 bp  
23 each). The coding region *ycf1* and the spacer *rpl16-rps3* outperformed plastid DNA markers  
24 previously used for barcoding and phylogenetics. We identified 456 cpSSRs in the *B. excelsa*  
25 plastome, from which we developed 130 primer pairs. Used in a phylogenetic analysis, the  
26 matrix of 24 plastomes showed with 100% bootstrap support that *Lecythis* and *Eschweilera* are

27 polyphyletic, indicating the need for more detailed systematics studies of these two important  
28 Amazonian tree genera.

## 29 **Keywords**

30 DNA Barcoding, genetic markers, Amazon, tropical trees, Lecythidaceae, plastome.

## 31 **Introduction**

32 Lecythidaceae (*sensu lato*) is a pantropical family of trees that contains three subfamilies:  
33 Foetidioideae, which is restricted to Madagascar; Planchonioideae, found in the tropical forests  
34 of Asia and Africa; and the Neotropical clade Lecythidoideae (Mori *et al.* 2007). The  
35 Lecythidoideae clade contains ca. 234 (Mori 2017) of the ca. 278 known species in the broader  
36 family (Mori *et al.* 2007; Huang *et al.* 2015; Mori *et al.* 2017; Mori 2017). Neotropical  
37 Lecythidaceae are understory, canopy, or emergent trees with distinctive floral morphology and  
38 woody fruit capsules. It is the third most abundant family of trees in the Amazon forest,  
39 following Fabaceae and Sapotaceae (ter Steege *et al.* 2013). The most species-rich genus,  
40 *Eschweilera* with ca. 99 species (Mori 2017), is the most abundant tree genus in the Amazon  
41 basin, as quantified in forest inventory plots scattered across the basin (ter Steege *et al.* 2013);  
42 and *Eschweilera coriacea* (DC.) S.A.Mori is the most common tree species in much of  
43 Amazonia (ter Steege *et al.* 2013). Among its species are the iconic Brazil nut tree, *Bertholletia*  
44 *excelsa* Bonpl.; the oldest documented angiosperm tree, *Cariniana micrantha* Ducke (dated at  
45 >1400 years old in Manaus, Brazil; Chambers *et al.* 1998); the cauliflorous cannonball tree  
46 commonly grown in botanical gardens, *Couroupita guianensis* Aubl.; and important timber  
47 species (e.g. *Carinaria legalis* (Mart.) Kuntze). Lecythidaceae provide important ecological

48 services such as carbon sequestration and food resource for pollinators (bats and large bees) and  
49 seed dispersers (monkeys and agouties) (Prance & Mori 1979, Mori & Prance 1990).

50 Species-level identification of Lecythidaceae and a robust phylogenetic hypothesis are  
51 essential for evolutionary and ecological research on Amazon tree diversity. However, despite  
52 their ease of identification at the family level, species-level identification of many Lecythidaceae  
53 (especially *Eschweilera*) is notoriously difficult when based on sterile (i.e. without fruit or floral  
54 material) herbarium specimens, and flowering specimens are often available only at multi-year  
55 intervals (Mori & Prance 1987). As a complement to other approaches, DNA barcoding (Dick &  
56 Kress 2009; Dexter *et al.* 2010) may be useful for the identification of species and clades of  
57 Lecythidaceae.

58 A combination of two protein-coding plastid regions (*rbcL* and *matK*) have been  
59 proposed as core plant DNA barcodes (Hollingsworth *et al.* 2009), although other coding and  
60 non-coding plastome regions (*rpoCl*, *rpoB*, *ycf5*, *trnL*, *psbA-trnH*) and the internal transcribed  
61 spacer (ITS) of nuclear ribosomal genes, have been recommended as supplemental barcodes for  
62 vascular plant identification (Kress *et al.* 2005; Lahaye *et al.* 2008; Li *et al.* 2011). However, an  
63 evaluation of these markers on Lecythidaceae in French Guiana (Gonzales *et al.* 2009) showed  
64 poor performance for species identification. Furthermore, the use of traditional markers (plastid  
65 *ndhF*, *trnL-F*, and *trnH-psbA*, and nuclear ITS) for phylogenetic analysis has produced weakly  
66 supported trees (Mori *et al.* 2007; Huang *et al.* 2015) indicating a need to develop more  
67 informative markers and/or increase molecular sampling.

68 The advent of high-throughput sequencing provides opportunities to obtain more  
69 informative DNA markers through the comparative analysis of full genomes. In this study, we

70 aimed to (1) assemble, annotate, and characterize the first complete plastome sequence of  
71 Lecythidaceae, the iconic Brazil nut tree *Bertholletia excelsa*; (2) obtain a robust backbone  
72 phylogeny for the Neotropical clade using newly-assembled draft plastome sequences for an  
73 additional 23 species; and (3) develop a novel set of molecular markers for DNA barcoding,  
74 population genetics, phylogeography, and phylogenetic inference.

## 75 **Methods**

### 76 **Plant material and DNA library preparation**

77 We performed genomic skimming on 24 Lecythidaceae species, including 23  
78 Lecythidoideae and one outgroup species (*Barringtonia edulis* Seem.) from the Planchonioideae.  
79 The sampling included all 10 Lecythidoideae genera (S1 Table). Silica-dried leaf tissue from  
80 herbarium-vouchered collections was collected by Scott Mori and colleagues and loaned by the  
81 New York Botanical Garden. Total genomic DNA was extracted from 20 milligrams of dried  
82 leaf tissue using the NucleoSpin Plant II extraction kit (Machery-Nagel, Bethlehem, PA, USA)  
83 with SDS lysis buffer. Prior to DNA library preparation, 5 micrograms of total DNA were  
84 fragmented using a Covaris S-series sonicator (Covaris, Inc. Woburn, MA, USA) following the  
85 manufacturer's protocol, to obtain ca. 300 bp insert-sizes. We prepared the sequencing library  
86 using the NEBNext DNA library Prep Master Mix and Multiplex Oligos for Illumina Sets (New  
87 England BioLabs Inc. Ipswich, MA, USA) according to the manufacturer's protocol. Size-  
88 selection was carried prior to PCR using Pippin Prep (Sage Science, Beverly, MA, USA).  
89 Molecular mass of the finished paired-end library was quantified using an Agilent 2100  
90 Bioanalyzer (Agilent Technologies Inc., Santa Clara, CA, USA) and by qPCR using an ABI  
91 PRISM 7900HT (ThermoFisher Scientific, Waltham, MA, USA) at the University of Michigan

92 DNA Sequencing Core (Ann Arbor, MI, USA). We sequenced the libraries on one lane of the  
93 Illumina HiSeq 2000 (Illumina Inc., San Diego, CA, USA) with a paired-read length of 100bp.

#### 94 **Plastome assembly**

95       Illumina adaptors and barcodes were excised from raw reads using Cutadapt v.1.4.2  
96 (Martin 2011). Reads were then quality-filtered using Prinseq v. 0.20.4 (Schmieder & Edwards  
97 2011), which trimmed 5' and 3' sequence ends with Phred quality score < 20 and removed all  
98 trimmed sequences <50 bp in length, with >5% ambiguous bases, or with mean Phred quality  
99 score <20. A combination of *de novo* and reference-guided approaches were used to assemble  
100 the plastomes. First, chloroplast reads were separated from the raw read pool by Blast-searching  
101 all raw reads against a database consisting of all complete angiosperm plastome sequences  
102 available on GenBank (accessed in 2014). Any aligned reads with an e-value <1<sup>-5</sup> were retained  
103 for subsequent analysis. The filtered chloroplast reads were *de novo* assembled using Velvet  
104 v.7.0.4 (Zerbino & Birney 2008) with kmer values of 71, 81, and 91 using a low-coverage cutoff  
105 of 5 and minimum contig length of 300. The assembled contigs were then mapped to a reference  
106 genome (see below) using Geneious v. R8 (Kearse *et al.* 2012) to determine their order and  
107 direction using the reference-guided assembly tool with medium sensitivity and iterative fine-  
108 tuning options. Finally, raw reads were iteratively mapped onto the draft genome assembly to  
109 extend contigs and fill gaps using low-sensitivity reference-guided assembly in Geneious. We  
110 first assembled the draft genome of *Bertholletia excelsa* for which only one contig was obtained;  
111 the plasomes of the remaining 23 species were assembled subsequently using the plastome of *B.*  
112 *excelsa* as a reference. The *B. excelsa* plastome was annotated using the DOGMA (Wyman *et al.*  
113 2004) with the default settings for chloroplast genomes. Codon start and stop positions were  
114 determined using the open reading frame finder in Geneious and by comparison with the

115 plastome sequence of *Camellia sinensis* var. *pubilimba* Hung T. Chang (Genbank ID:  
116 KJ806280). A circular representation of the *B. excelsa* plastome was made using OGDraw V1.2  
117 (Lohse *et al.* 2007). The complete annotated plastome of *B. excelsa* and the draft plastomes of  
118 the remaining 23 Lecythidaceae species sampled were deposited in GenBank (Table S1).

## 119 **Identification of molecular markers**

120 Chloroplast simple sequence repeats (cpSSRs) in *B. excelsa* were identified using the  
121 Phobos Tandem Repeat Finder v.3.3.12 (Mayer 2010) by searching for uninterrupted repeats of  
122 nucleotide units of 1 to 6 bp in length, with thresholds of  $\geq 7$  mononucleotide repeats,  $\geq 4$   
123 dinucleotide repeats, and  $\geq 3$  tri-, tetra-, penta-, and hexanucleotide repeats. We developed  
124 primers to amplify the cpSSRs using Primer 3 v.2.3.4 (Untergasser *et al.* 2012) with the default  
125 options and setting the PCR product size range between 100 and 250 bp.

126 The 24 plastomes were aligned with MAFFT v.7.017 (Kato *et al.*, 2002) and scanned for  
127 regions of high nucleotide diversity,  $\pi$  (Nei 1987), using a sliding window analysis implemented  
128 in DNAsp v.5.10.1 (Librado & Rozas 2009) with a window and a step size of 600 bp. Levels of  
129 nucleotide diversity were plotted using R (R core development group), and windows with values  
130 over the 95<sup>th</sup> percentile were considered of high  $\pi$ .

131 Because regions with high  $\pi$  do not necessarily have high phylogenetic signal (e.g.  
132 unalignable hypervariable regions), to identify phylogenetically influential regions we employed  
133 a log-likelihood approach modified from Walker *et al.* (2017). First, we inferred a phylogenetic  
134 tree with the plastome alignment (including only one inverted repeat) by performing 100  
135 independent maximum likelihood (ML) searches using a GTRCAT model with RAxML v. 8.2.9  
136 (Stamatakis, 2014). Those searches resulted in the same topology that was subsequently

137 annotated with the summary from 100 bootstraps using “sumtrees.py” v.4.10 (Sukumaran &  
138 Holder 2010). Then, we calculated the site-specific log-likelihood in the alignment over the  
139 plastome phylogeny and calculated their differences site-wise to the averaged log-likelihood per  
140 site of 1000 randomly permuted trees (tips were randomly shuffled). Log-likelihood scores were  
141 calculated with RAxML. The site-wise log-likelihood differences (LD) were calculated using  
142 600 bp non-overlapping windows with a custom R script (see below). We interpreted greater  
143 (LD) as an indication of greater phylogenetic signal, and windows with LD above the 95<sup>th</sup>  
144 percentile were considered to have exceptional phylogenetic signal.

145         Primers flanking the top ten regions with high  $\pi$  were designed using Primer 3 with  
146 default program options. We employed a maximum product size of 1300 bp because lower  
147 cutoffs values (e.g. 600 bp) made the primer design extremely challenging due to the lack of  
148 conserved regions. Primers were designed to amplify across all 23 Neotropical species without  
149 the use of degenerate bases. However, primers with a small number of degenerate bases were  
150 permitted for some regions where primer development otherwise would not have been possible  
151 due to high sequence variability in the priming sites. We investigated the potential of our  
152 markers to produce robust phylogenies by calculating individual gene trees in RAxML v.8.2.9 in  
153 an ML search with 100 rapid bootstraps (option “-f a”) using the GTRCAT model. To evaluate  
154 the number of markers needed to obtain a resolved tree with an average of ~90 bootstrap support  
155 (BS), we first concatenated the two markers with the highest  $\pi$  and inferred a tree; subsequently  
156 we added another marker to the matrix based on the ranking obtained from the  $\pi$  score. We  
157 iterated this process until we obtained a matrix with each of the 10 markers developed. For every  
158 tree obtained, we calculated its average BS and its Robinson-Foulds distance (RF) (Robinson and  
159 Foulds 1981) from the plastome phylogeny, using a custom R script employing the packages

160 APE (Paradis *et al.* 2004) and Phangor (Schliep 2011). Scripts and alignments used for this study  
161 can be found at [https://bitbucket.org/oscarvargash/lecythidaceae\\_plastomes](https://bitbucket.org/oscarvargash/lecythidaceae_plastomes).

## 162 **Results**

### 163 **Lecythidaceae plastome features**

164 The sequenced plastome of *Bertholletia excelsa* contained 160,472 base pairs and 117  
165 genes, of which 4 were rRNAs and 31 were tRNAs (Fig. 1). The arrangement of the *B. excelsa*  
166 plastome had a typical angiosperm quadripartite structure with a single copy region of 85,830 bp,  
167 a small single copy region of 16,670 bp, and two inverted of repeats of 27,481 bp each. Relative  
168 to *Camellia sinensis* var. *pubilimba*, the closest relative of Lecythidaceae with a sequenced  
169 plastome, we find no gene gain/losses in *B. excelsa*; the only main structural difference is that the  
170 inverted repeat of *B. excelsa* contained the genes *trnH-GUG*, *rps3*, *rpl22*, and *rps19* while in *C.*  
171 *sinensis* var. *pubilimba* these regions were located in the large single copy region. In addition to  
172 *B. excelsa*, the plastome of *Eschweilera alata* A.C.Sm. was also completely assembled; the  
173 coverage for the remaining plastomes ranged between 85% and 99.60% (S1 Table). From the  
174 non-*Bertholletia* plastomes, *Barringtonia edulis* and *Corythophora amapaensis* Pires ex  
175 S.A.Mori & Prance seemed to have lost *ycf15* and *psaA*, respectively.

### 176 **Identification of molecular markers**

177 Within the plastome of *Bertholletia excelsa* we found 456 cpSSRs (Table 1). We  
178 designed 130 primers pairs for cpSSR amplification (S2 Table) for regions outside of coding  
179 regions with an acceptable product length, annealing temperature, and GC content.  $\pi$  for nine  
180 600 bp windows exceeded the 95<sup>th</sup> percentile (Fig. 2A, Table 2). Similarly, 13 windows were  
181 over the 95<sup>th</sup> percentile for LD (Fig. 2B, Table 3) indicating high phylogenetic signal. While



182 most of the informative windows were located in non-coding regions, two consecutive regions  
183 were positioned in the *ycf1* gene. Six windows contained both high  $\pi$  and LD. As expected, high  
184  $\pi$  and greater LD largely agreed. Based on the rank of the windows obtained for nucleotide  
185 diversity we developed primers for the following regions (ordered from high to low nucleotide  
186 diversity): *ycf1*, *rpl16-rps3*, *psbM-trnD*, *ccsA-ndhD*, *trnG-psaB*, *petD-rpoA*, *psbZ-trnfM*, *trnE-*  
187 *trnT*, and *trnT-psbD* (Table 3).

## 188 **Phylogenetics of the plastomes and the developed markers**

189 The ML analysis of the plastome alignment for the Lecythydaceae (145,487 sites) yielded  
190 a fully resolved phylogeny with high BS for all clades (Fig. 3). Of the genera in which the  
191 sampling included multiples species, *Eschweilera* and *Lecythis* were polyphyletic, while  
192 *Allantoma*, *Corythophora*, *Couratari*, and *Gustavia* were monophyletic (*Bertholletia* is  
193 monospecific, and only one species of *Couroupita*, *Cariniana*, and *Grias* and were included in  
194 the analysis). The trees obtained from individual markers with high nucleotide diversity had an  
195 average BS of 73 throughout their nodes, while for the trees obtained from two or more  
196 concatenated regions had an average BS of 89 (Fig. 4A). None of the gene trees, single or  
197 combined, recovered the topology obtained using the complete plastome matrix (none of the  
198 gene trees obtained a RF = 0, Fig. 4B). In general, matrices with concatenated markers (mean RF  
199 = 6) outperformed single markers (mean RF = 13.8).

## 200 **Discussion**

### 201 **Genetic markers from the Lecythydaceae plastome**

202 We are publishing the first full plastome for Lecythydaceae, including high-depth  
203 coverage of the Brazil nut tree, and 23 draft genomes representing all Lecythydoideae genera and a

204 Paleotropical outgroup taxon. We found no significant gene losses or major rearrangements  
205 when the plastome of *Bertholletia excelsa* was compared with that of *Camellia sinensis* var.  
206 *pubilimba*, a closely related plastome (Theaceae). However, there are likely to be some gene  
207 losses within the broader Lecythidoideae and Lecythidaceae, as indicated by the loss of *ycf15* in  
208 *Barringtonia edulis* and *psbA* in *Corythophora amapaensis*.

209 We inferred a robust backbone phylogeny for Lecythoideae using the 24 aligned  
210 plastomes. All nodes in our topology had 100% bootstrap support with the exception of a node  
211 that connects three closely related species of *Eschweilera*. The topology agreed with previous but  
212 weakly supported (<50% BS) Lecythidaceae phylogenies, based on chloroplast and nuclear ITS  
213 (internal transcribed spacer) sequences (Mori *et al.* 2007, Huang *et al.* 2015), indicating that  
214 *Eschweilera* and *Lecythis* are polyphyletic. Although the polyphyly of these two genera is well  
215 supported with all available data, some inferred species-level relationships may change with  
216 increased taxonomic sampling and the inclusion of nuclear genomic data.

217 We measured nucleotide diversity ( $\pi$ ) and a proxy for phylogenetic signal using a log-  
218 likelihood approach (LD) modified from Walker *et al.* (2017). These calculations helped us to  
219 evaluate the performance of specific chloroplast regions as potential phylogenetic markers. The  
220 core plant DNA barcodes *matK* and *rbcL* did not exhibit high  $\pi$  or LD in our analysis. Of the  
221 secondary plant DNA barcodes mentioned in the literature (*rpoCl*, *rpoB*, *ycf5*, *trnL*, *psbA-trnH*;  
222 Kress *et al.*, 2005, Lahaye *et al.* 2008, Hollingsworth 2009, Li *et al.* 2011) only *psbA-trnH*  
223 showed high LD (Table 3) although it did not exhibit exceptionally high values of  $\pi$ . In contrast,  
224 the regions *ycf1*, *rpl16-rps3*, *psbM-trnD*, *ccsA-ndhD*, *trnG-psaB*, *petD-rpoA*, *psbZ-trnfM*, *trnE-*  
225 *trnT*, and *trnT-psbD* displayed the highest values of  $\pi$  and LD and therefore outperformed all of  
226 the previously proposed plant DNA barcodes.

227 Phylogenetic trees calculated from concatenated marker sets (based on rank)  
228 outperformed single regions in terms of support (BS) and accuracy (RF) (Fig. 4). In fact, tree  
229 topologies using single markers deviated relatively highly from the complete plastome tree  
230 (mean RF= 13.8). The best performing concatenated matrix contained all 10 regions for which  
231 we developed primers. However, the combination of *ycf1* and *rpl16-rps3* produced an average  
232 BS ~90 (Fig. 4A) with reasonable accuracy (RF = 4, Fig. 4B); we conclude that these two  
233 regions, amplified in three PCRs (Table 3), are promising markers for DNA barcoding,  
234 phylogeny, and phylogeography in Lecythidaceae. Although barcoding efficiency in species-rich  
235 clades (i.e. *Eschweilera/Lecythis*) might decline with the addition of more samples, *ycf1* and  
236 *rpl16-rps3* effectively distinguished between three closely-related species within the *E.*  
237 *parvifolia* clade (see branch lengths in Fig. S1), suggesting that these markers might effectively  
238 distinguish between many other closely related species. Our results and conclusions agree with  
239 those of Dong *et al.* (2015) who proposed *ycf1* as a universal barcode for land plants.

240 The 130 cpSSR markers developed for noncoding portions of the *B. excelsa* plastome  
241 provide a useful resource for population genetic studies. Because of their fast stepwise mutation  
242 rate relative to SNPs, cpSSRs can also be used for finer grain phylogeographic analyses (e.g.  
243 Lemes *et al.* 2010; Twyford *et al.* 2013). This may be especially useful for species that exhibit  
244 little geographic structuring across parts of their ranges. Because they are maternally transmitted  
245 and can be variable within populations, the cpSSRs may also be used to track dispersal of seeds  
246 and seedlings relative to the maternal source trees.

247 Because of their high level of polymorphism and phylogenetic signal content, the cpDNA  
248 markers presented here should be useful for phylogeographic studies of widespread  
249 Lecythidaceae species. For example, *Couratari guianensis* Aubl. and *Eschweilera coriacea*

250 range from the Amazon basin into Central America, and other species range broadly across the  
251 Amazon basin, the Guiana Shield, and the Atlantic forests.

## 252 **Barcoding of tropical trees**

253 DNA barcoding of tropical trees has been useful for several applications, including  
254 community phylogenetic analyses (Kress *et al.* 2009), inferring the species identity of the gut  
255 content (diet) of herbivores (García-Robledo *et al.* 2013), and for species identification of  
256 seedlings (Gonzalez *et al.* 2009). The power of DNA barcodes to discriminate among species  
257 should be high if the studied species are distantly related; for example, Kress *et al.* (2009) were  
258 able to discriminate 281 of 296 tree and shrub species from Barro Colorado Island (BCI) using  
259 standard DNA barcodes, but they were not able to discriminate among some congeneric species  
260 in the species-rich genera *Inga* (Fabaceae), *Ficus* (Moraceae), and *Piper* (Piperaceae). Gonzales  
261 *et al.* (2009) encountered similar challenges with *Eschweilera* species in their study of trees and  
262 seedlings in Paracou, French Guiana. The latter study tested a wide range of putative DNA  
263 barcode regions (*rbcLa*, *rpoCl*, *rpoB*, *matK*, *ycf5*, *trnL*, *psbA-trnH*, ITS), however, they did not  
264 include the markers presented in this paper.

## 265 **Limitations of plastome markers for phylogeny and species ID**

266 The newly-identified plastome markers revealed by our study, while promising, are not  
267 free of limitations. First, plastome-based phylogenies should be interpreted with caution, as they  
268 can disagree with nuclear markers and species trees due to introgression and or lineage sorting  
269 issues (Rieseberg & Soltis 1997; Sun *et al.* 2015; Vargas *et al.* 2017). Second, hybridization and  
270 incomplete lineage sorting would also affect the performance of plastome barcodes for species  
271 identification and therefore ecological studies derived from such. For example, cpDNA  
272 haplotypes of *Nothofagus*, *Eucalyptus*, *Quercus*, *Betula*, and *Acer* were more strongly

273 determined by geographic location than by species-identity due to the occurrence of localized  
274 introgression within these groups (Petit *et al.* 1993; Palme *et al.* 2004; Saeki *et al.* 2011; Premoli  
275 *et al.* 2012; Nevill *et al.* 2014; Thomson *et al.* 2015). The occurrence of haplotype sharing in  
276 closely-related Lecythidaceae species has, to date, not been examined at a large scale and it is  
277 therefore not possible to conclude to what extent introgression or incomplete lineage sorting  
278 might affect this group. However, unique plastome sequences were retrieved for each of the 24  
279 species sequenced in this study, including closely related *Eschweilera* and *Lecythis*, suggesting  
280 that incomplete lineage sorting was not an issue at the scale of our analysis. We suggest that  
281 future studies utilizing cpDNA barcodes for Neotropical Lecythidaceae examine species from  
282 several shared geographic localities to examine to what extent haplotypes tend to be shared  
283 among species at the same localities. Alternatively, nuclear barcode markers such as ITS could  
284 be used to examine incongruence of plastome versus nuclear markers to identify cases where  
285 introgression might have occurred.

## 286 **Acknowledgements**

287 National Science Foundation (DEB 1240869 and FESD Type I 1338694 to CD) and the  
288 University of Michigan (Associate Professor Award to CD) provided financial support for this  
289 work. We would like to thank Scott Mori, Gregory Stull, Caroline Parins-Fukuchi, and Joseph  
290 Walker for comments; and Scott Mori and the New York Botanical Garden for providing access  
291 to curated DNA samples of Lecythidaceae.

## 292 Literature cited:

- 293 Chambers, J. Q., Higuchi, N., & Schimel, J. P. (1998). Ancient trees in Amazonia. *Nature*,  
294 391(6663), 135–136. doi:10.1038/34325
- 295 Dexter, K. G., Pennington, T. D., & Cunningham, C. W. (2010). Using DNA to assess errors in  
296 tropical tree identifications: How often are ecologists wrong and when does it matter?  
297 *Ecological Monographs*, 80(2), 267–286.
- 298 Dick, C. W., & Kress, W. J. (2009). Dissecting tropical plant diversity with forest plots and a  
299 molecular toolkit. *BioScience*, 59(9), 745–755. doi:10.1525/bio.2009.59.9.6
- 300 Dong, W., Xu, C., Li, C., Sun, J., Zuo, Y., Shi, S., ... Zhou, S. (2015). ycf1, the most promising  
301 plastid DNA barcode of land plants. *Scientific Reports*, 5, 8348. doi:10.1038/srep08348
- 302 García-Robledo, C., Erickson, D. L., Staines, C. L., Erwin, T. L., & Kress, W. J. (2013). Tropical  
303 plant-herbivore networks: reconstructing species interactions using DNA barcodes. *PLoS*  
304 *ONE*, 8(1), e52967. doi:10.1371/journal.pone.0052967
- 305 Gonzalez, M. A., Baraloto, C., Engel, J., Mori, S. A., Pétronelli, P., Riéra, B., ... Chave, J.  
306 (2009). Identification of Amazonian trees with DNA barcodes. *PLoS ONE*, 4(10), e7483.  
307 doi:10.1371/journal.pone.0007483
- 308 Hollingsworth, P. M., Forrest, L. L., Spouge, J. L., Hajibabaei, M., Ratnasingham, S., van der  
309 Bank, M., ... Little, D. P. (2009). A DNA barcode for land plants. *Proceedings of the*  
310 *National Academy of Sciences of the United States of America*, 106(31), 12794–12797.  
311 doi:10.1073/pnas.0905845106
- 312 Huang, Y. Y., Mori, S. A., & Kelly, L. M. (2015). Toward a phylogenetic-based generic  
313 classification of neotropical Lecythidaceae—I. Status of *Bertholletia*, *Corythophora*,  
314 *Eschweilera* and *Lecythis*. *Phytotaxa*, 203(2), 85–121. doi:10.11646/phytotaxa.203.2.1
- 315 Katoh, K., Misawa, K., Kuma, K., & Miyata, T. (2002). MAFFT: a novel method for rapid  
316 multiple sequence alignment based on fast Fourier transform. *Nucleic Acids Research*,  
317 30(14), 3059–3066. doi:10.1093/nar/gkf436
- 318 Kearse, M., Moir, R., Wilson, A., Stones-Havas, S., Cheung, M., Sturrock, S., ... Drummond, A.  
319 (2012). Geneious Basic: An integrated and extendable desktop software platform for the  
320 organization and analysis of sequence data. *Bioinformatics*, 28(12), 1647–1649.  
321 doi:10.1093/bioinformatics/bts199
- 322 Kress, W. J., Erickson, D. L., Jones, F. A., Swenson, N. G., Perez, R., Sanjur, O., &  
323 Bermingham, E. (2009). Plant DNA barcodes and a community phylogeny of a tropical  
324 forest dynamics plot in Panama. *Proceedings of the National Academy of Sciences of the*  
325 *United States of America*, 106(44), 18621–6. doi:10.1073/pnas.0909820106

- 326 Kress, W. J., Wurdack, K. J., Zimmer, E. A., Weigt, L. A., & Janzen, D. H. (2005). Use of DNA  
327 barcodes to identify flowering plants. *Proceedings of the National Academy of Sciences of*  
328 *the United States of America*, 102(23), 8369–8374. doi:10.1073/pnas.0503123102
- 329 Lahaye, R., van der Bank, M., Bogarin, D., Warner, J., Pupulin, F., Gigot, G., ... Savolainen, V.  
330 (2008). DNA barcoding the floras of biodiversity hotspots. *Proceedings of the National*  
331 *Academy of Sciences of the United States of America*, 105(8), 2923–2928.  
332 doi:10.1073/pnas.0709936105
- 333 Lemes, M. R., Dick, C. W., Navarro, C., Lowe, A. J., Cavers, S., & Gribel, R. (2010).  
334 Chloroplast DNA microsatellites reveal contrasting phylogeographic structure in mahogany  
335 (*Swietenia macrophylla* King, Meliaceae) from Amazonia and Central America. *Tropical*  
336 *Plant Biology*, 3(1), 40–49. doi:10.1007/s12042-010-9042-5
- 337 Li, D.-Z., Gao, L.-M., Li, H.-T., Wang, H., Ge, X.-J., Liu, J.-Q., ... Duan, G.-W. (2011).  
338 Comparative analysis of a large dataset indicates that internal transcribed spacer (ITS)  
339 should be incorporated into the core barcode for seed plants. *Proceedings of the National*  
340 *Academy of Sciences of the United States of America*, 108(49), 19641–19646.  
341 doi:10.1073/pnas.1104551108
- 342 Librado, P., & Rozas, J. (2009). DnaSP v5: A software for comprehensive analysis of DNA  
343 polymorphism data. *Bioinformatics*, 25(11), 1451–1452. doi:10.1093/bioinformatics/btp187
- 344 Lohse, M., Drechsel, O., & Bock, R. (2007). OrganellarGenomeDRAW (OGDRAW): A tool for  
345 the easy generation of high-quality custom graphical maps of plastid and mitochondrial  
346 genomes. *Current Genetics*, 52(5–6), 267–274. doi:10.1007/s00294-007-0161-y
- 347 Martin, M. (2011). Cutadapt removes adapter sequences from high-throughput sequencing reads.  
348 *EMBnet journal*, 17(1), 10–12. doi:10.14806/ej.17.1.200
- 349 Mayer, C. (2010) Phobos. Available from: [http://www.rub.de/spezzoo/cm/cm\\_phobos.htm](http://www.rub.de/spezzoo/cm/cm_phobos.htm)
- 350 Mori, S. A., Kiernan, E. A., Smith, N. P., Kelley, L. M., Huang, Y.-Y., Prance, G. T., & Thiers.,  
351 B. (2017). Observations on the phytogeography of the Lecythidaceae clade (Brazil nut  
352 family). *Phytoneuron*, 30, 1–85.
- 353 Mori, S. A., & Prance, G. T. (1987). A Guide to Collecting Lecythidaceae. *Annals of the*  
354 *Missouri Botanical Garden*, 74(2), 321–330.
- 355 Mori, S. A., & Prance, G. T. (1990). Lecythidaceae. Part II. The zygomorphic-flowered New  
356 World genera (*Couroupita*, *Corythophora*, *Bertholletia*, *Couratari*, *Eschweilera*, &  
357 *Lecythis*. *Flora Neotropica*, 21, 1–376.
- 358 Mori, S. A., Tsou, C. H., Wu, C. C., Cronholm, B., & Anderberg, A. A. (2007). Evolution of  
359 Lecythidaceae with an emphasis on the circumscription of neotropical genera: Information

- 360 from combined ndhF and trnL-F sequence data. *American Journal of Botany*, 94(3), 289–  
361 301. doi:10.3732/ajb.94.3.289
- 362 Mori, S.A. (2017). The Lecythidaceae pages. <http://sweetgum.nybg.org/science/projects/lp/>
- 363 Nei, M. (1987). *Molecular Evolutionary Genetics*. New York: Columbia University Press.
- 364 Nevill, P. G., Després, T., Bayly, M. J., Bossinger, G., & Ades, P. K. (2014). Shared  
365 phylogeographic patterns and widespread chloroplast haplotype sharing in Eucalyptus  
366 species with different ecological tolerances. *Tree Genetics and Genomes*, 10(4), 1079–1092.  
367 doi:10.1007/s11295-014-0744-y
- 368 Palme, A. E., Su, Q., Palsson, S., & Lascoux, M. (2004). Extensive sharing of chloroplast  
369 haplotypes among European birches indicates hybridization among *Betula pendula*, *B.*  
370 *pubescens* and *B. nana*. *Molecular Ecology*, 13(1), 167–178. doi:10.1046/j.1365-  
371 294X.2003.02034.x
- 372 Paradis, E., Claude, J., & Strimmer, K. (2004). APE: Analyses of phylogenetics and evolution in  
373 R language. *Bioinformatics*, 20(2), 289–290. doi:10.1093/bioinformatics/btg412
- 374 Petit, R. J., Kremer, A., & Wagner, D. B. (1993). Geographic structure of chloroplast DNA  
375 polymorphisms in European oaks. *Theoretical and Applied Genetics: International Journal of*  
376 *Plant Breeding Research*, 87(1), 122–128. doi:10.1007/BF00223755
- 377 Prance, G. T., & Mori, S. A. (1979). Lecythidaceae—Part I. The actinomorphic-flowered New  
378 World Lecythidaceae (*Asteranthos*, *Gustavia*, *Grias*, *Allantoma*, & *Carinaria*). *Flora*  
379 *Neotropica Monograph*, 21, 1–270.
- 380 Premoli, A. C., Mathiasen, P., Cristina Acosta, M., & Ramos, V. A. (2012). Phylogeographically  
381 concordant chloroplast DNA divergence in sympatric *Nothofagus* s.s. How deep can it be?  
382 *New Phytologist*, 193(1), 261–275. doi:10.1111/j.1469-8137.2011.03861.x
- 383 R Core Team. (2017) R: A Language and Environment for Statistical Computing. Available  
384 from: <https://www.r-project.org/>
- 385 Rieseberg, L. H., & Soltis, D. E. (1991). Phylogenetic consequences of cytoplasmic gene flow in  
386 plants. *Evolutionary Trends in Plants*, 5(1), 64–84. doi:10.1007/s00606-006-0485-y
- 387 Robinson, D. F., & Foulds, L. R. (1981). Comparison of phylogenetic trees. *Mathematical*  
388 *Biosciences*, 53(1–2), 131–147. doi:10.1016/0025-5564(81)90043-2
- 389 Saeki, I., Dick, C. W., Barnes, B. V., & Murakami, N. (2011). Comparative phylogeography of  
390 red maple (*Acer rubrum* L.) and silver maple (*Acer saccharinum* L.): Impacts of habitat  
391 specialization, hybridization and glacial history. *Journal of Biogeography*, 38(5), 992–1005.  
392 doi:10.1111/j.1365-2699.2010.02462.x



- 393 Schliep, K. P. (2011). phangorn: Phylogenetic analysis in R. *Bioinformatics*, 27(4), 592–593.  
394 doi:10.1093/bioinformatics/btq706
- 395 Schmieder, R., & Edwards, R. (2011). Quality control and preprocessing of metagenomic  
396 datasets. *Bioinformatics*, 27(6), 863–864. doi:10.1093/bioinformatics/btr026
- 397 Stamatakis, A. (2014). RAxML version 8: A tool for phylogenetic analysis and post-analysis of  
398 large phylogenies. *Bioinformatics*, 30(9), 1312–1313. doi:10.1093/bioinformatics/btu033
- 399 Sukumaran, J., & Holder, M. T. (2010). DendroPy: A Python library for phylogenetic  
400 computing. *Bioinformatics*, 26(12), 1569–1571. doi:10.1093/bioinformatics/btq228
- 401 Sun, M., Soltis, D. E., Soltis, P. S., Zhu, X., Burleigh, J. G., & Chen, Z. (2015). Deep  
402 phylogenetic incongruence in the angiosperm Rosidae clade. *Molecular Phylogenetics and*  
403 *Evolution*, 83, 156–166. doi:10.1016/j.ympev.2014.11.003
- 404 ter Steege, H., Pitman, N. C. A., Sabatier, D., Baraloto, C., Salomão, R. P., Guevara, J. E., ...  
405 Silman, M. R. (2013). Hyperdominance in the Amazonian tree flora. *Science*, 342(6156),  
406 325–342. doi:10.1126/science.1243092
- 407 Thomson, A. M., Dick, C. W., & Dayanandan, S. (2015). A similar phylogeographical structure  
408 among sympatric North American birches (*Betula*) is better explained by introgression than  
409 by shared biogeographical history. *Journal of Biogeography*, 42(2), 339–350.  
410 doi:10.1111/jbi.12394
- 411 Twyford, A. D., Kidner, C. a, Harrison, N., & Ennos, R. a. (2013). Population history and seed  
412 dispersal in widespread Central American *Begonia* species (Begoniaceae) inferred from  
413 plastome-derived microsatellite markers. *Botanical Journal of the Linnean Society*, 171,  
414 260–276.
- 415 Untergasser, A., Cutcutache, I., Koressaar, T., Ye, J., Faircloth, B. C., Remm, M., & Rozen, S.  
416 G. (2012). Primer3-new capabilities and interfaces. *Nucleic Acids Research*, 40(15), 1–12.  
417 doi:10.1093/nar/gks596
- 418 Vargas, O. M., Ortiz, E. M., & Simpson, B. B. (2017). Conflicting phylogenomic signals reveal a  
419 pattern of reticulate evolution in a recent high-Andean diversification (Asteraceae:  
420 Astereae: Diplostephium). *New Phytologist*, 214, 1736–1750. doi:10.1111/nph.14530
- 421 Walker, J. F., Brown, J. W., & Smith, S. A. (2017). Analyzing contentious relationships and  
422 outlier genes in phylogenomics. *bioRxiv*. doi:http://dx.doi.org/10.1101/115774
- 423 Wyman, S. K., Jansen, R. K., & Boore, J. L. (2004). Automatic annotation of organellar  
424 genomes with DOGMA. *Bioinformatics*, 20(17), 3252–3255.  
425 doi:10.1093/bioinformatics/bth352

426 Zerbino, D. R., & Birney, E. (2008). Velvet: algorithms for de novo short read assembly using de  
427 Bruijn graphs. *Genome Research*, 18(5), 821–829. doi:10.1101/gr.074492.107

428

429 **Data Accessibility:**

430 DNA sequences: Genbank accessions MF359935–MF359958

431 Plastome alignment, gene alignments, trees, and R code:

432 [https://bitbucket.org/oscarvargash/lecythidaceae\\_plastomes](https://bitbucket.org/oscarvargash/lecythidaceae_plastomes)

433

434 **Tables**

435 **Table 1** Total number of perfect simple sequence repeats (SSRs) identified within the plastome  
 436 of *Bertholletia excelsa*.

| SSR Sequence | Number of Repeats |    |   |   |     |    |    |    |    |    |    |    |    |    |    | Total |
|--------------|-------------------|----|---|---|-----|----|----|----|----|----|----|----|----|----|----|-------|
|              | 3                 | 4  | 5 | 6 | 7   | 8  | 9  | 10 | 11 | 12 | 13 | 14 | 15 | 16 | 17 |       |
| A            | -                 | -  | - | - | 153 | 70 | 38 | 22 | 14 | 5  | 1  | 2  |    |    |    | 305   |
| C            | -                 | -  | - | - | 10  | 1  | -  | -  | -  | -  | -  | -  | -  | -  | 1  | 12    |
| ATC          | -                 | -  | - | - | -   | -  | -  | -  | -  | -  | -  | -  | -  | -  | -  | 0     |
| AG           | -                 | 13 | - | - | -   | -  | -  | -  | -  | -  | -  | -  | -  | -  | -  | 13    |
| AT           | -                 | 23 | 3 | - | 1   | -  | -  | -  | -  | -  | -  | -  | -  | -  | -  | 27    |
| AAC          | 8                 | -  | - | - | -   | -  | -  | -  | -  | -  | -  | -  | -  | -  | -  | 8     |
| AAG          | 24                | -  | - | - | -   | -  | -  | -  | -  | -  | -  | -  | -  | -  | -  | 24    |
| AAT          | 25                | 2  | - | - | -   | -  | -  | -  | -  | -  | -  | -  | -  | -  | -  | 27    |
| ACC          | 3                 | -  | - | - | -   | -  | -  | -  | -  | -  | -  | -  | -  | -  | -  | 3     |
| AGC          | 7                 | -  | - | - | -   | -  | -  | -  | -  | -  | -  | -  | -  | -  | -  | 7     |
| AGG          | 9                 | -  | - | - | -   | -  | -  | -  | -  | -  | -  | -  | -  | -  | -  | 9     |
| ATC          | 7                 | -  | - | - | -   | -  | -  | -  | -  | -  | -  | -  | -  | -  | -  | 7     |
| AATC         | 1                 | -  | - | - | -   | -  | -  | -  | -  | -  | -  | -  | -  | -  | -  | 1     |
| AATT         | 1                 | -  | - | - | -   | -  | -  | -  | -  | -  | -  | -  | -  | -  | -  | 1     |
| AAAG         | 3                 | -  | - | - | -   | -  | -  | -  | -  | -  | -  | -  | -  | -  | -  | 3     |
| AAAT         | 3                 | 1  | - | - | -   | -  | -  | -  | -  | -  | -  | -  | -  | -  | -  | 4     |
| AAAAT        | 2                 | -  | - | - | -   | -  | -  | -  | -  | -  | -  | -  | -  | -  | -  | 2     |
| AACTT        | 1                 | -  | - | - | -   | -  | -  | -  | -  | -  | -  | -  | -  | -  | -  | 1     |
| AAAATT       | 1                 | -  | - | - | -   | -  | -  | -  | -  | -  | -  | -  | -  | -  | -  | 1     |
| AAACTC       | 1                 | -  | - | - | -   | -  | -  | -  | -  | -  | -  | -  | -  | -  | -  | 1     |
| <b>Total</b> | 96                | 39 | 3 | 0 | 164 | 71 | 38 | 22 | 14 | 5  | 1  | 2  | 0  | 0  | 1  | 456   |

437

438 **Table 2** Regions of the chloroplast regions binned in windows of 600 sites with high (above the  
 439 95<sup>th</sup> percentile) nucleotide diversity (ND) and/or site-wise log-likelihood score differences (LD).  
 440 LSC: large single copy. SSC: small single copy (see main text). Coding regions are indicated in  
 441 windows that have the same 5' and 3' expressed flanking region in column 3. Notice that no  
 442 regions are reported for the inverted repeat (IR). Coordinates are given on the alignment and the  
 443 *Bertholletia excelsa* plastome that are assembled with the standard LSC-SSC-IR structure.

| Location in the alignment | <i>Bertholletia cp</i><br>genome location | Closest flanking expressed<br>region |                  | Region | $\pi$ | LD |
|---------------------------|-------------------------------------------|--------------------------------------|------------------|--------|-------|----|
|                           |                                           | 5'                                   | 3'               |        |       |    |
| 1–600                     | 1–490                                     | <i>trnH</i>                          | <i>psbA</i>      | LSC    |       | *  |
| 5401–6000                 | 4885–5373                                 | <i>trnK-UUU</i>                      | <i>rps16</i>     | LSC    |       | *  |
| 34801–35400               | 30925–31450                               | <i>petN</i>                          | <i>trnD-GUC</i>  | LSC    |       | *  |
| 35401–36000               | 31451–31967                               | <i>psbM</i>                          | <i>trnD-GUC</i>  | LSC    | *     | *  |
| 37201–37800               | 33027–33573                               | <i>trnE-UUC</i>                      | <i>trnT-GGU</i>  | LSC    | *     | *  |
| 39601–40200               | 34893–35433                               | <i>trnT-GGU</i>                      | <i>psbD</i>      | LSC    |       | *  |
| 43801–44400               | 38798–39254                               | <i>psbZ</i>                          | <i>trnfM-CAU</i> | LSC    | *     | *  |
| 44401–45000               | 39255–39744                               | <i>trnfM-CAU</i>                     | <i>psaB</i>      | LSC    | *     | *  |
| 61201–61800               | 54771–55275                               | <i>trnV-UAC</i>                      | <i>atpE</i>      | LSC    |       | *  |
| 78601–79200               | 70230–70771                               | <i>psaJ</i>                          | <i>rps18</i>     | LSC    |       | *  |
| 89801–90400               | 80536–81103                               | <i>petD</i>                          | <i>rpoA</i>      | LSC    | *     |    |
| 95401–96000               | 85455–85906                               | <i>rpl16</i>                         | <i>rps3</i>      | LSC    | *     |    |
| 131401–132000             | 119237–119759                             | <i>ccsA</i>                          | <i>ndhD</i>      | SSC    | *     |    |
| 140401–141000             | 127827–128402                             | <i>rps15</i>                         | <i>ycf1</i>      | SSC    |       | *  |
| 144001–144600             | 131283–131868                             | <i>ycf1</i>                          | <i>ycf1</i>      | SSC    | *     | *  |
| 144601–145200             | 131869–132446                             | <i>ycf1</i>                          | <i>ycf1</i>      | SSC    | *     | *  |

444  
 445

446 **Table 3** Primer sequences used to amplify the ten most polymorphic Lecythidaceae plastome  
 447 regions, as sorted by decreasing nucleotide diversity ( $\pi$ ). The product size (length) references the  
 448 *Bertholletia excelsa* plastome.

| Window in the alignment | $\pi$   | Region            | Forward primer Sequence (5' - 3') | Reverse primer Sequence (5' - 3') | Length (bp) |
|-------------------------|---------|-------------------|-----------------------------------|-----------------------------------|-------------|
| 144103-145487           | 0.04691 | <i>ycf1</i>       | AGAACCTTTGATTATGTCTCGACG          | AGAGACATGCTATAAAAATAGCCCA         | 118         |
| 95034-95741             | 0.03446 | <i>rpl16-rps3</i> | AGAGTTTCTTCTCATCCAGCTCC           | GCTTAGTGTGTGACTCGTTGG             | 101         |
| 35585-36413             | 0.02920 | <i>psbM-trnD</i>  | CCGTTCTTTCTTTCTATAACCTACCC        | ACGCTGGTTCAAATCCAGCT              | 109         |
| 143235-144102           | 0.02733 | <i>ycf1</i>       | TGATTCGAATCTTTTAGCATTAKAACT       | KCGTCGAGACATAATCAAAGGT            | 118         |
| 131180-132054           | 0.02576 | <i>ccsA-ndhD</i>  | CCGAGTGGTTAATAATGCACGT            | GCTTCTTTCATTACCGGG                | 118         |
| 44398-45132             | 0.02537 | <i>trnG-psaB</i>  | TCGATYCCCGCTATCCGCC               | GCCAATTTGATTTCGATGGAGAGA          | 88          |
| 89032-89688             | 0.02464 | <i>petD-rpoA</i>  | TGGGAGTGTGTGACTTGAACCT            | TGACCCATCCCTTTAGCCAA              | 82          |
| 43412-44397             | 0.02456 | <i>psbZ-trnfM</i> | TCCAATTGRCTGTTTTTGCATTAATTG       | CCTTGAGGTCACGGGTTCAA              | 70          |
| 37444-38345             | 0.02409 | <i>trnE-trnT</i>  | AGACGATGGGGGCATACTTG              | CCACTTACTTTTTCTTTTGTGTTGTTGA      | 132         |
| 38346-40085             | 0.02391 | <i>trnT-psbD</i>  | GGCGTAAGTCATCGGTTCAA              | CCCAAAGCGAAATAGGCACA              | 171         |

449

450

451 **Figures**

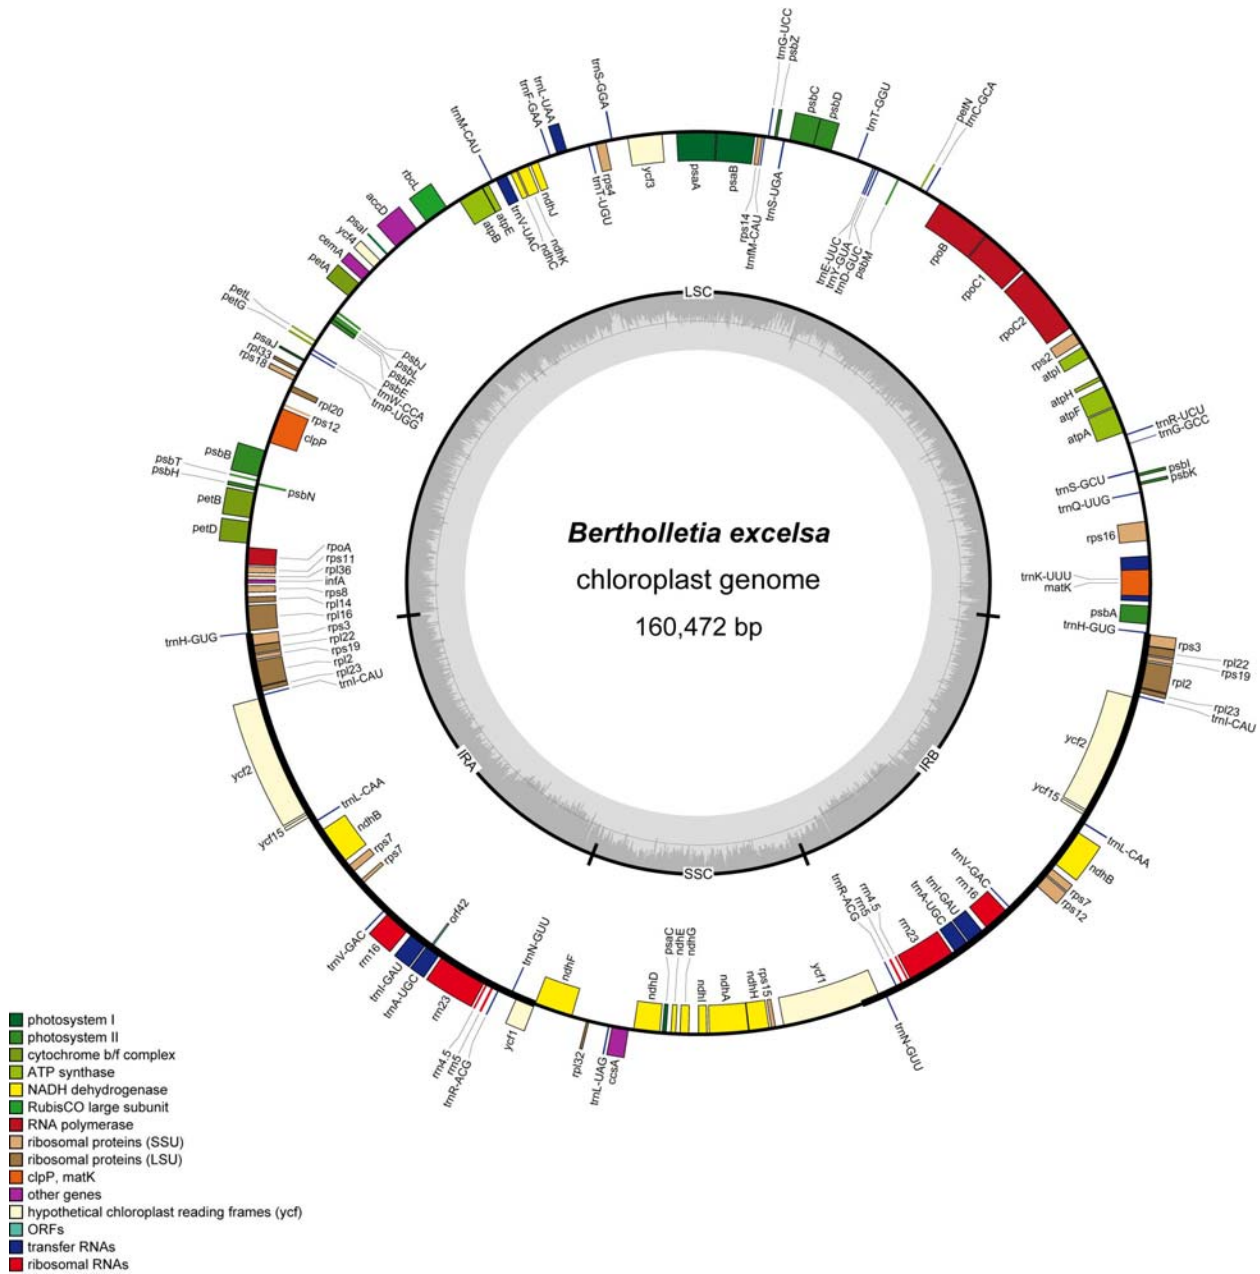

452

453 **Fig. 1** Plastome map of the Brazil-nut tree *Bertholletia excelsa*. Genes outside the circle are  
 454 transcribed clockwise, genes inside the circle are transcribed counter-clockwise. Gray bars in the  
 455 inner ring show the GC content percentage.

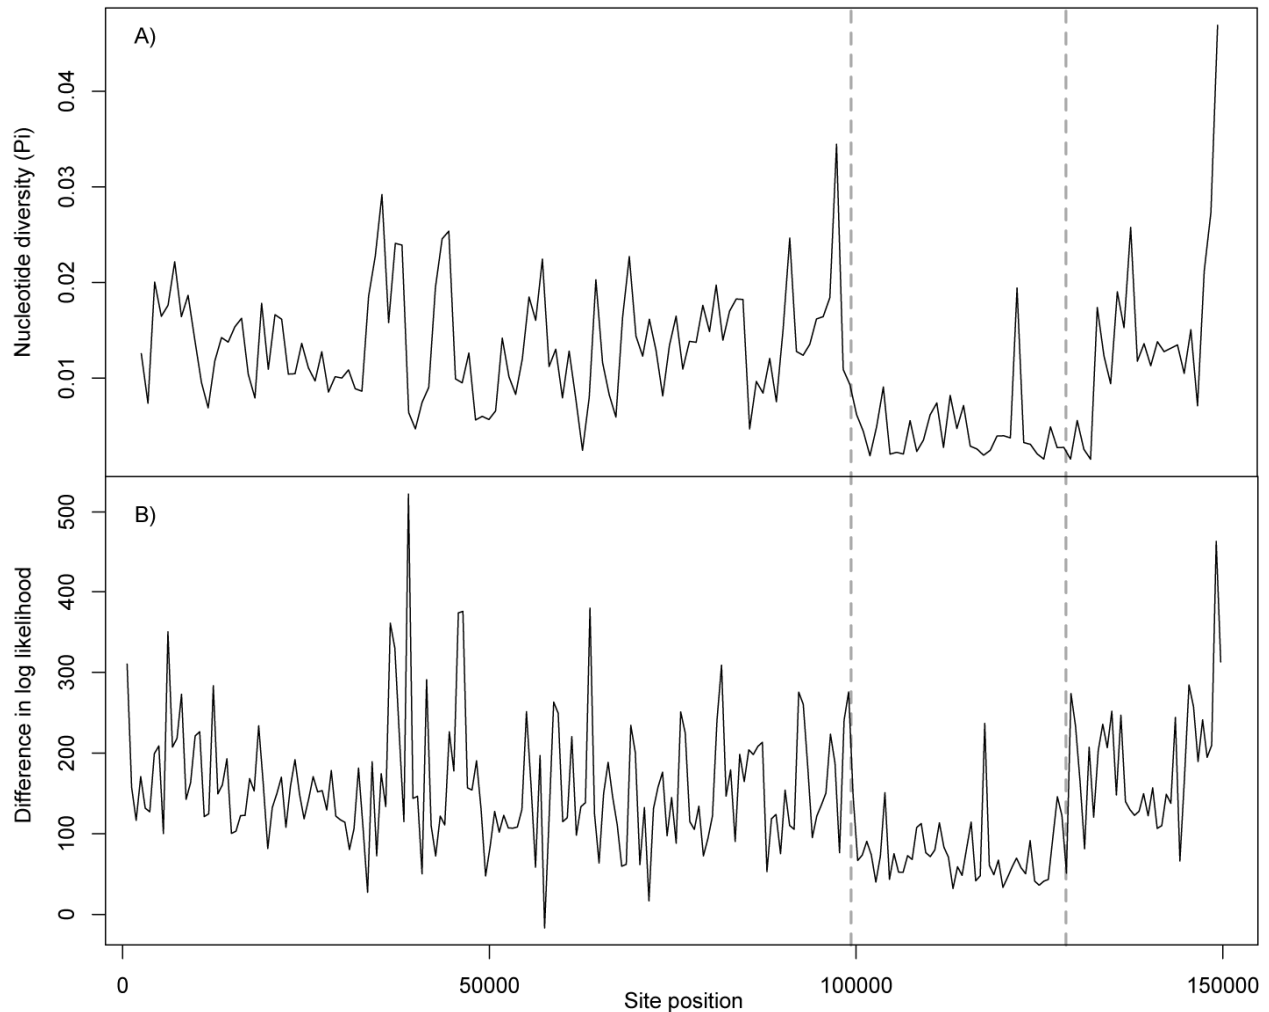

456

457 **Fig. 2** A) Sliding window plot of nucleotide diversity ( $\pi$ ) across the alignment of 24 sequenced  
458 Lecythidaceae plastomes. B) Alignment site-wise differences in log-likelihood calculated from  
459 the chloroplast topology vs. the averaged scores of 1000 random trees using a 600-site window.  
460 Regions with greater log-likelihood differences contain higher phylogenetic signal. Dashed lines  
461 indicate the boundaries, from left to right, among the large single copy, the inverted repeat, and  
462 the small single copy.



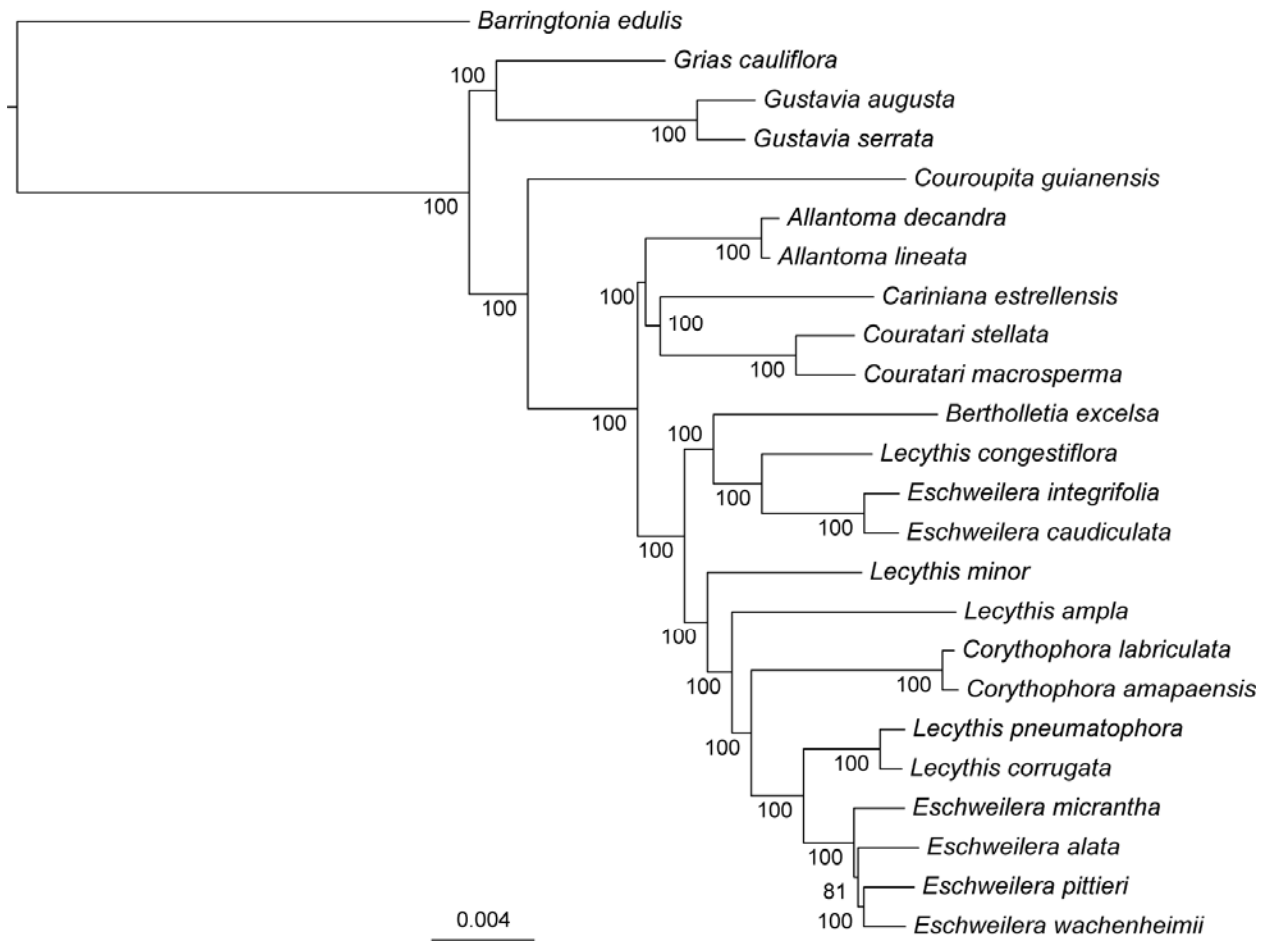

463

464 **Fig. 3** Maximum likelihood phylogeny inferred from plastomes of Neotropical Lecythidaceae.  
465 Numbers at nodes indicate bootstrap support.

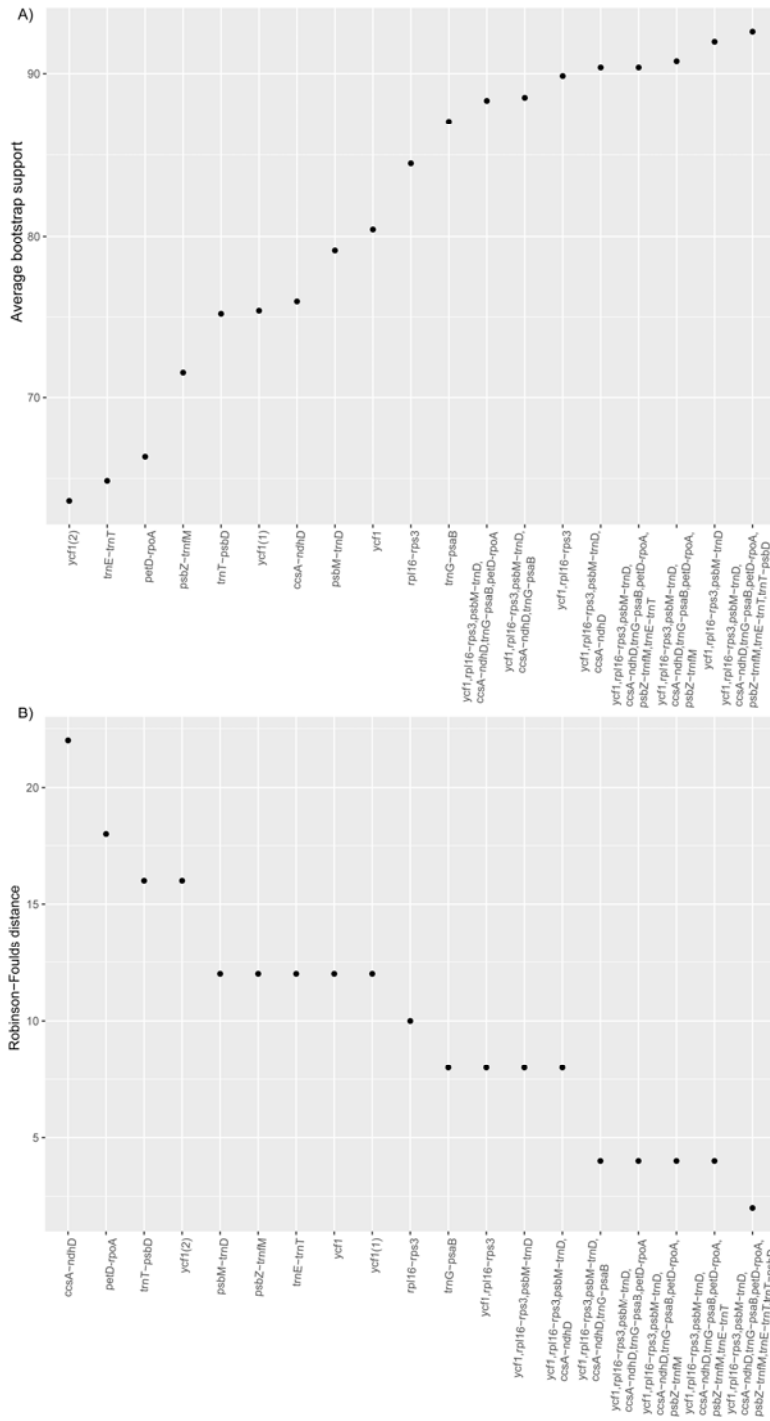

466

467 **Fig. 4** A) Average bootstrap support for trees inferred from matrices of concatenated regions  
 468 with relatively high nucleotide diversity sorted in ascending order; and B) Robinson-Foulds  
 469 distance (RF) sorted in descending order. Lower RF distances, which measures the number of  
 470 different bipartitions from the complete plastome topology, indicate better accuracy.

## 471 **Supporting information**

472 **Fig. S1** Trees obtained from single and combined markers with high nucleotide diversity.

473 **Table S1** Lecythidaceae species sequenced with their voucher, assembly information, and  
474 GenBank accession number. All voucher specimens are deposited at herbarium of the New York  
475 Botanical Garden (NY).

476 **Table S2** Primers for the amplification of simple sequence repeats in the plastome of  
477 *Bertholletia excelsa*.
